# Supplementary material
Source: Springer Nature journal article supplement (https://www.springermedizin.de/resource/supplementary/12936_2009_1212_MOESM2_ESM.pdf/9549222)
Supplement: MOESM2 [file 9549222]

**FC27**    **SIRRS**MANEGSNTNSVGANAPN---ADTIASGSQRSTNSASTSTTNNGESQTTTP**TA**ADTIASGSQRSTNSASTSTTNNGESQTTTP**TA**-----

**Allele 1**    .....K-----

**Allele 2**    .....K-----

**Allele 3**    .....APN.....S-----

**Allele 4**    .....K.....K-----S-----

**Allele 5**    .....T-----

**Allele 6**    .....D·K.....S-----ADTIASGSQRSTNSASTSTTNNGESQTTTP**TA**

**Allele 7**    -----

**FC27**    ADTPTATESISPSPPITTT-----ESSKFWQCTNKTDGKGESEKQNELNE**STEE**GPK

|                 |                                                                                          | Total (n) |
|-----------------|------------------------------------------------------------------------------------------|-----------|
| <b>Allele 1</b> | .....K·N.....ESNSPSPPITTTESNSPSPPITTT-----SSGNAP.....K·K.....                            | 10        |
| <b>Allele 2</b> | .....K·N.....ESNSPSPPITTTESNSPSPPITTT-----SSGNAP.....                                    | 7         |
| <b>Allele 3</b> | .....N.....ESNSPSPPITTTESNSPSPPITTT-----SSGNAP.....K·K.....                              | 9         |
| <b>Allele 4</b> | .....N·R.....ESNSRSPPI <b>TTTES</b> NSRSPPI <b>TTTES</b> NSRSPPI <b>TTT</b> ·SSGNAP..... | 12        |
| <b>Allele 5</b> | .....K·N.....ESNSPSPPITTT <b>ERN</b> SPSPPI <b>TTT</b> -----SSGNAP.....                  | 18        |
| <b>Allele 6</b> | .....N.....SSGNAP.....                                                                   | 5         |
| <b>Allele 7</b> | -----SSGNAP.....                                                                         | 6         |
